# Supplementary material for: Age of the Tuchengzi Formation in Western Liaoning Province and the Jurassic–Cretaceous Boundary from the Continuous Core Records of Well YD1, Jinyang Basin
Source: MDPI journal article supplement (doi:10.3390/min12080953), 2022-07-28
Supplement: s1 [file s1]

Table S1. LA-ICP-MS zircon U-Pb data of the glassy crystal tuff (YD1-50).

| Point number | Th (ppm) | U (ppm) | Th /U | Isotope ratio                        |         |                                     |         |                                     |         | Age (Ma)                             |       |                                     |     |                                     |     |
|--------------|----------|---------|-------|--------------------------------------|---------|-------------------------------------|---------|-------------------------------------|---------|--------------------------------------|-------|-------------------------------------|-----|-------------------------------------|-----|
|              |          |         |       | <sup>207</sup> Pb/ <sup>206</sup> Pb | 1σ      | <sup>207</sup> Pb/ <sup>235</sup> U | 1σ      | <sup>206</sup> Pb/ <sup>238</sup> U | 1σ      | <sup>207</sup> Pb/ <sup>206</sup> Pb | 1σ    | <sup>207</sup> Pb/ <sup>235</sup> U | 1σ  | <sup>206</sup> Pb/ <sup>238</sup> U | 1σ  |
| YD1-50-01    | 330      | 590     | 0.56  | 0.05084                              | 0.00161 | 0.15313                             | 0.00572 | 0.02180                             | 0.00034 | 235.3                                | 69.4  | 144.7                               | 5.0 | 139.0                               | 2.2 |
| YD1-50-02    | 365      | 765     | 0.48  | 0.04855                              | 0.00143 | 0.14417                             | 0.00463 | 0.02156                             | 0.00031 | 127.9                                | 70.4  | 136.7                               | 4.1 | 137.5                               | 2.0 |
| YD1-50-03    | 271      | 372     | 0.73  | 0.05258                              | 0.00236 | 0.15806                             | 0.00764 | 0.02193                             | 0.00038 | 309.3                                | 101.8 | 149.0                               | 6.7 | 139.9                               | 2.4 |
| YD1-50-05    | 217      | 339     | 0.64  | 0.04949                              | 0.00184 | 0.14730                             | 0.00575 | 0.02169                             | 0.00042 | 172.3                                | 87.0  | 139.5                               | 5.1 | 138.3                               | 2.7 |
| YD1-50-06    | 256      | 487     | 0.53  | 0.05201                              | 0.00160 | 0.15444                             | 0.00536 | 0.02161                             | 0.00039 | 287.1                                | 70.4  | 145.8                               | 4.7 | 137.8                               | 2.5 |
| YD1-50-07    | 242      | 298     | 0.81  | 0.04828                              | 0.00197 | 0.14093                             | 0.00593 | 0.02125                             | 0.00035 | 122.3                                | 96.3  | 133.9                               | 5.3 | 135.6                               | 2.2 |
| YD1-50-08    | 255      | 332     | 0.77  | 0.05261                              | 0.00193 | 0.15740                             | 0.00559 | 0.02189                             | 0.00036 | 322.3                                | 80.5  | 148.4                               | 4.9 | 139.6                               | 2.3 |
| YD1-50-09    | 484      | 661     | 0.73  | 0.05025                              | 0.00157 | 0.14964                             | 0.00512 | 0.02167                             | 0.00036 | 205.6                                | 72.2  | 141.6                               | 4.5 | 138.2                               | 2.3 |
| YD1-50-12    | 357      | 375     | 0.95  | 0.05197                              | 0.00187 | 0.15192                             | 0.00545 | 0.02135                             | 0.00035 | 283.4                                | 83.3  | 143.6                               | 4.8 | 136.2                               | 2.2 |
| YD1-50-14    | 187      | 322     | 0.58  | 0.04976                              | 0.00177 | 0.15002                             | 0.00561 | 0.02191                             | 0.00034 | 183.4                                | 83.3  | 141.9                               | 5.0 | 139.7                               | 2.2 |
| YD1-50-15    | 146      | 198     | 0.74  | 0.05240                              | 0.00228 | 0.15193                             | 0.00696 | 0.02114                             | 0.00045 | 301.9                                | 93.5  | 143.6                               | 6.1 | 134.9                               | 2.8 |
| YD1-50-17    | 435      | 656     | 0.66  | 0.05045                              | 0.00139 | 0.15301                             | 0.00432 | 0.02211                             | 0.00037 | 216.7                                | 64.8  | 144.6                               | 3.8 | 141.0                               | 2.4 |
| YD1-50-18    | 320      | 328     | 0.98  | 0.05126                              | 0.00196 | 0.15204                             | 0.00583 | 0.02159                             | 0.00036 | 253.8                                | 88.9  | 143.7                               | 5.1 | 137.7                               | 2.3 |
| YD1-50-19    | 307      | 549     | 0.56  | 0.05370                              | 0.00155 | 0.15807                             | 0.00459 | 0.02144                             | 0.00036 | 366.7                                | 66.7  | 149.0                               | 4.0 | 136.8                               | 2.3 |
| YD1-50-20    | 218      | 221     | 0.98  | 0.04839                              | 0.00278 | 0.14780                             | 0.00973 | 0.02192                             | 0.00039 | 116.8                                | 138.9 | 140.0                               | 8.6 | 139.7                               | 2.5 |
| YD1-50-21    | 118      | 159     | 0.74  | 0.05031                              | 0.00291 | 0.14806                             | 0.00895 | 0.02145                             | 0.00039 | 209.3                                | 130.5 | 140.2                               | 7.9 | 136.8                               | 2.5 |
| YD1-50-22    | 304      | 392     | 0.78  | 0.05243                              | 0.00202 | 0.15266                             | 0.00620 | 0.02111                             | 0.00032 | 305.6                                | 88.9  | 144.3                               | 5.5 | 134.7                               | 2.0 |
| YD1-50-23    | 413      | 280     | 1.47  | 0.05042                              | 0.00330 | 0.14875                             | 0.00912 | 0.02156                             | 0.00032 | 213.0                                | 156.5 | 140.8                               | 8.1 | 137.5                               | 2.0 |
| YD1-50-24    | 181      | 290     | 0.63  | 0.04847                              | 0.00231 | 0.14457                             | 0.00689 | 0.02178                             | 0.00037 | 120.5                                | 112.9 | 137.1                               | 6.1 | 138.9                               | 2.3 |
| YD1-50-26    | 389      | 446     | 0.87  | 0.05176                              | 0.00151 | 0.15560                             | 0.00451 | 0.02188                             | 0.00039 | 276.0                                | 66.7  | 146.8                               | 4.0 | 139.5                               | 2.4 |
| YD1-50-27    | 65       | 91      | 0.72  | 0.05133                              | 0.00372 | 0.14482                             | 0.01009 | 0.02084                             | 0.00040 | 257.5                                | 166.6 | 137.3                               | 9.0 | 133.0                               | 2.5 |
| YD1-50-28    | 278      | 405     | 0.69  | 0.05102                              | 0.00180 | 0.15282                             | 0.00626 | 0.02162                             | 0.00044 | 242.7                                | 76.8  | 144.4                               | 5.5 | 137.9                               | 2.8 |
| YD1-50-29    | 202      | 251     | 0.81  | 0.05383                              | 0.00287 | 0.15730                             | 0.00829 | 0.02126                             | 0.00050 | 364.9                                | 120.4 | 148.3                               | 7.3 | 135.6                               | 3.1 |
| YD1-50-32    | 278      | 322     | 0.86  | 0.04986                              | 0.00185 | 0.14835                             | 0.00558 | 0.02162                             | 0.00034 | 187.1                                | 87.0  | 140.5                               | 4.9 | 137.9                               | 2.2 |
| YD1-50-33    | 230      | 358     | 0.64  | 0.05103                              | 0.00191 | 0.15096                             | 0.00627 | 0.02140                             | 0.00032 | 242.7                                | 87.0  | 142.8                               | 5.5 | 136.5                               | 2.0 |
| YD1-50-35    | 236      | 339     | 0.70  | 0.04845                              | 0.00173 | 0.14488                             | 0.00578 | 0.02161                             | 0.00030 | 120.5                                | 88.0  | 137.4                               | 5.1 | 137.8                               | 1.9 |
| YD1-50-36    | 146      | 300     | 0.49  | 0.05249                              | 0.00240 | 0.15784                             | 0.00753 | 0.02191                             | 0.00040 | 305.6                                | 103.7 | 148.8                               | 6.6 | 139.7                               | 2.5 |
| YD1-50-37    | 112      | 207     | 0.54  | 0.04916                              | 0.00257 | 0.14277                             | 0.00738 | 0.02121                             | 0.00034 | 166.8                                | 122.2 | 135.5                               | 6.6 | 135.3                               | 2.1 |
| YD1-50-39    | 320      | 434     | 0.74  | 0.04949                              | 0.00155 | 0.14800                             | 0.00482 | 0.02180                             | 0.00036 | 172.3                                | 74.1  | 140.1                               | 4.3 | 139.0                               | 2.3 |

Continued Table S1. LA-ICP-MS zircon U-Pb data of the glassy crystal tuff (YD1-50).

| Point number | Th (ppm) | U (ppm) | Th /U | Isotope ratio                        |         |                                     |         |                                     |         | Age (Ma)                             |       |                                     |     |                                     |     |
|--------------|----------|---------|-------|--------------------------------------|---------|-------------------------------------|---------|-------------------------------------|---------|--------------------------------------|-------|-------------------------------------|-----|-------------------------------------|-----|
|              |          |         |       | <sup>207</sup> Pb/ <sup>206</sup> Pb | 1σ      | <sup>207</sup> Pb/ <sup>235</sup> U | 1σ      | <sup>206</sup> Pb/ <sup>238</sup> U | 1σ      | <sup>207</sup> Pb/ <sup>206</sup> Pb | 1σ    | <sup>207</sup> Pb/ <sup>235</sup> U | 1σ  | <sup>206</sup> Pb/ <sup>238</sup> U | 1σ  |
| YD1-50-43    | 126      | 209     | 0.60  | 0.05195                              | 0.00289 | 0.15669                             | 0.00916 | 0.02180                             | 0.00036 | 283.4                                | 127.8 | 147.8                               | 8.0 | 139.0                               | 2.3 |
| YD1-50-47    | 423      | 589     | 0.72  | 0.04856                              | 0.00163 | 0.13958                             | 0.00521 | 0.02080                             | 0.00036 | 127.9                                | 77.8  | 132.7                               | 4.6 | 132.7                               | 2.3 |
| YD1-50-48    | 416      | 408     | 1.02  | 0.04925                              | 0.00146 | 0.14838                             | 0.00512 | 0.02184                             | 0.00041 | 166.8                                | 63.9  | 140.5                               | 4.5 | 139.3                               | 2.6 |
| YD1-50-50    | 150      | 157     | 0.95  | 0.05388                              | 0.00253 | 0.15523                             | 0.00765 | 0.02087                             | 0.00037 | 364.9                                | 110.2 | 146.5                               | 6.7 | 133.1                               | 2.3 |
| YD1-50-51    | 195      | 208     | 0.94  | 0.04890                              | 0.00268 | 0.14384                             | 0.00813 | 0.02146                             | 0.00041 | 142.7                                | 162.0 | 136.5                               | 7.2 | 136.9                               | 2.6 |
| YD1-50-52    | 222      | 223     | 0.99  | 0.04888                              | 0.00240 | 0.14190                             | 0.00678 | 0.02115                             | 0.00035 | 142.7                                | 110.2 | 134.7                               | 6.0 | 134.9                               | 2.2 |
| YD1-50-54    | 423      | 445     | 0.95  | 0.05211                              | 0.00203 | 0.15057                             | 0.00539 | 0.02117                             | 0.00036 | 300.1                                | 88.9  | 142.4                               | 4.8 | 135.0                               | 2.3 |
| YD1-50-56    | 310      | 573     | 0.54  | 0.05234                              | 0.00182 | 0.15308                             | 0.00613 | 0.02115                             | 0.00033 | 301.9                                | 77.8  | 144.6                               | 5.4 | 134.9                               | 2.1 |
| YD1-50-59    | 215      | 220     | 0.98  | 0.05033                              | 0.00273 | 0.15323                             | 0.00856 | 0.02229                             | 0.00049 | 209.3                                | 125.9 | 144.8                               | 7.5 | 142.1                               | 3.1 |
| YD1-50-61    | 493      | 292     | 1.69  | 0.04862                              | 0.00226 | 0.13891                             | 0.00663 | 0.02074                             | 0.00041 | 127.9                                | 109.2 | 132.1                               | 5.9 | 132.3                               | 2.6 |
| YD1-50-62    | 527      | 486     | 1.08  | 0.04933                              | 0.00166 | 0.14964                             | 0.00539 | 0.02209                             | 0.00040 | 164.9                                | 77.8  | 141.6                               | 4.8 | 140.8                               | 2.5 |
| YD1-50-63    | 350      | 278     | 1.26  | 0.04933                              | 0.00211 | 0.14078                             | 0.00613 | 0.02075                             | 0.00030 | 164.9                                | 100.0 | 133.7                               | 5.5 | 132.4                               | 1.9 |
| YD1-50-67    | 395      | 537     | 0.74  | 0.05239                              | 0.00180 | 0.15784                             | 0.00586 | 0.02190                             | 0.00039 | 301.9                                | 84.3  | 148.8                               | 5.1 | 139.6                               | 2.5 |
| YD1-50-70    | 319      | 549     | 0.58  | 0.04908                              | 0.00177 | 0.14051                             | 0.00481 | 0.02090                             | 0.00033 | 150.1                                | 85.2  | 133.5                               | 4.3 | 133.3                               | 2.1 |
| YD1-50-71    | 262      | 316     | 0.83  | 0.04810                              | 0.00243 | 0.13833                             | 0.00691 | 0.02102                             | 0.00038 | 105.6                                | 114.8 | 131.6                               | 6.2 | 134.1                               | 2.4 |
| YD1-50-72    | 390      | 324     | 1.20  | 0.05113                              | 0.00208 | 0.14908                             | 0.00612 | 0.02124                             | 0.00040 | 255.6                                | 94.4  | 141.1                               | 5.4 | 135.5                               | 2.6 |
| YD1-50-73    | 378      | 417     | 0.91  | 0.04969                              | 0.00173 | 0.14278                             | 0.00497 | 0.02095                             | 0.00040 | 189.0                                | 81.5  | 135.5                               | 4.4 | 133.7                               | 2.5 |
| YD1-50-75    | 197      | 192     | 1.03  | 0.04978                              | 0.00314 | 0.14118                             | 0.00807 | 0.02099                             | 0.00041 | 183.4                                | 146.3 | 134.1                               | 7.2 | 133.9                               | 2.6 |
| YD1-50-81    | 443      | 571     | 0.78  | 0.05039                              | 0.00141 | 0.14762                             | 0.00469 | 0.02123                             | 0.00035 | 213.0                                | 64.8  | 139.8                               | 4.2 | 135.4                               | 2.2 |
| YD1-50-86    | 233      | 338     | 0.69  | 0.05344                              | 0.00191 | 0.15958                             | 0.00671 | 0.02164                             | 0.00044 | 346.4                                | 81.5  | 150.3                               | 5.9 | 138.0                               | 2.8 |
| YD1-50-87    | 183      | 285     | 0.64  | 0.04826                              | 0.00249 | 0.14701                             | 0.00796 | 0.02211                             | 0.00034 | 122.3                                | 105.5 | 139.3                               | 7.0 | 141.0                               | 2.1 |
| YD1-50-89    | 386      | 598     | 0.65  | 0.05075                              | 0.00152 | 0.15539                             | 0.00535 | 0.02230                             | 0.00041 | 227.8                                | 65.7  | 146.7                               | 4.7 | 142.2                               | 2.6 |
| YD1-50-90    | 386      | 437     | 0.88  | 0.04959                              | 0.00176 | 0.15170                             | 0.00572 | 0.02232                             | 0.00039 | 176.0                                | 78.7  | 143.4                               | 5.0 | 142.3                               | 2.5 |
| YD1-50-93    | 248      | 453     | 0.55  | 0.04965                              | 0.00190 | 0.14963                             | 0.00615 | 0.02202                             | 0.00043 | 189.0                                | 88.9  | 141.6                               | 5.4 | 140.4                               | 2.7 |
| YD1-50-94    | 463      | 708     | 0.65  | 0.04889                              | 0.00146 | 0.14879                             | 0.00485 | 0.02216                             | 0.00034 | 142.7                                | 65.7  | 140.8                               | 4.3 | 141.3                               | 2.2 |
| YD1-50-95    | 220      | 216     | 1.02  | 0.04995                              | 0.00267 | 0.14306                             | 0.00761 | 0.02090                             | 0.00035 | 194.5                                | 128.7 | 135.8                               | 6.8 | 133.3                               | 2.2 |
| YD1-50-96    | 220      | 348     | 0.63  | 0.05352                              | 0.00217 | 0.15807                             | 0.00673 | 0.02148                             | 0.00035 | 350.1                                | 90.7  | 149.0                               | 5.9 | 137.0                               | 2.2 |
| YD1-50-98    | 364      | 295     | 1.23  | 0.05148                              | 0.00221 | 0.15274                             | 0.00631 | 0.02169                             | 0.00034 | 261.2                                | 102.8 | 144.3                               | 5.6 | 138.3                               | 2.2 |
| YD1-50-100   | 260      | 389     | 0.67  | 0.04939                              | 0.00185 | 0.14528                             | 0.00557 | 0.02144                             | 0.00038 | 164.9                                | 87.0  | 137.7                               | 4.9 | 136.7                               | 2.4 |

**Table S2.** LA-ICP-MS zircon U-Pb data of the calcareous feldspar lithic sandstone (YD1-464).

| Point number | Th (ppm) | U (ppm) | Th/U | Isotope ratio                        |            |                                     |            |                                     |            | Age (Ma)                             |            |                                     |            |                                     |            |
|--------------|----------|---------|------|--------------------------------------|------------|-------------------------------------|------------|-------------------------------------|------------|--------------------------------------|------------|-------------------------------------|------------|-------------------------------------|------------|
|              |          |         |      | <sup>207</sup> Pb/ <sup>206</sup> Pb | 1 $\sigma$ | <sup>207</sup> Pb/ <sup>235</sup> U | 1 $\sigma$ | <sup>206</sup> Pb/ <sup>238</sup> U | 1 $\sigma$ | <sup>207</sup> Pb/ <sup>206</sup> Pb | 1 $\sigma$ | <sup>207</sup> Pb/ <sup>235</sup> U | 1 $\sigma$ | <sup>206</sup> Pb/ <sup>238</sup> U | 1 $\sigma$ |
| YD1-464-01   | 637      | 930     | 0.69 | 0.04986                              | 0.00161    | 0.17699                             | 0.00575    | 0.02575                             | 0.00032    | 187.1                                | 69.4       | 165.5                               | 5.0        | 163.9                               | 2.0        |
| YD1-464-03   | 601      | 517     | 1.16 | 0.05324                              | 0.00156    | 0.23952                             | 0.00716    | 0.03268                             | 0.00054    | 338.9                                | 97.2       | 218.0                               | 5.9        | 207.3                               | 3.3        |
| YD1-464-06   | 158      | 554     | 0.29 | 0.05330                              | 0.00148    | 0.36608                             | 0.01144    | 0.04971                             | 0.00065    | 342.7                                | 95.4       | 316.7                               | 8.5        | 312.8                               | 4.0        |
| YD1-464-07   | 236      | 177     | 1.33 | 0.16902                              | 0.00244    | 10.71549                            | 0.23693    | 0.45902                             | 0.00714    | 2547.8                               | 24.1       | 2498.8                              | 20.5       | 2435.2                              | 31.5       |
| YD1-464-11   | 240      | 293     | 0.82 | 0.16423                              | 0.00236    | 10.72106                            | 0.25910    | 0.47394                             | 0.01023    | 2499.7                               | 24.1       | 2499.3                              | 22.4       | 2500.8                              | 44.8       |
| YD1-464-12   | 400      | 769     | 0.52 | 0.05112                              | 0.00161    | 0.16302                             | 0.00517    | 0.02325                             | 0.00041    | 255.6                                | 72.2       | 153.3                               | 4.5        | 148.2                               | 2.6        |
| YD1-464-13   | 413      | 333     | 1.24 | 0.05251                              | 0.00142    | 0.31589                             | 0.00982    | 0.04360                             | 0.00069    | 309.3                                | 56.5       | 278.7                               | 7.6        | 275.1                               | 4.3        |
| YD1-464-15   | 104      | 183     | 0.57 | 0.18218                              | 0.00264    | 12.93988                            | 0.27438    | 0.51569                             | 0.00903    | 2673.2                               | 24.1       | 2675.3                              | 20.0       | 2680.9                              | 38.4       |
| YD1-464-16   | 150      | 295     | 0.51 | 0.15986                              | 0.00228    | 11.23579                            | 0.28398    | 0.50956                             | 0.01045    | 2454.0                               | 24.1       | 2542.9                              | 23.6       | 2654.8                              | 44.6       |
| YD1-464-17   | 264      | 599     | 0.44 | 0.16304                              | 0.00225    | 10.56655                            | 0.28171    | 0.47233                             | 0.01351    | 2487.3                               | 22.7       | 2485.8                              | 24.7       | 2493.8                              | 59.2       |
| YD1-464-18   | 757      | 519     | 1.46 | 0.05269                              | 0.00138    | 0.28502                             | 0.00940    | 0.03914                             | 0.00056    | 322.3                                | 59.3       | 254.6                               | 7.4        | 247.5                               | 3.5        |
| YD1-464-19   | 46       | 60      | 0.77 | 0.05370                              | 0.00390    | 0.37797                             | 0.02838    | 0.05128                             | 0.00109    | 366.7                                | 167.6      | 325.5                               | 20.9       | 322.4                               | 6.7        |
| YD1-464-20   | 918      | 1383    | 0.66 | 0.05080                              | 0.00118    | 0.30150                             | 0.00891    | 0.04305                             | 0.00080    | 231.6                                | 53.7       | 267.6                               | 7.0        | 271.7                               | 5.0        |
| YD1-464-23   | 515      | 269     | 1.91 | 0.05029                              | 0.00220    | 0.16823                             | 0.00799    | 0.02423                             | 0.00043    | 209.3                                | 101.8      | 157.9                               | 6.9        | 154.4                               | 2.7        |
| YD1-464-26   | 239      | 436     | 0.55 | 0.05259                              | 0.00159    | 0.30191                             | 0.00934    | 0.04182                             | 0.00073    | 322.3                                | 75.0       | 267.9                               | 7.3        | 264.1                               | 4.5        |
| YD1-464-28   | 76       | 65      | 1.17 | 0.16336                              | 0.00319    | 10.51063                            | 0.21677    | 0.46786                             | 0.00792    | 2490.4                               | 33.0       | 2480.9                              | 19.1       | 2474.2                              | 34.8       |
| YD1-464-31   | 90       | 132     | 0.68 | 0.05249                              | 0.00335    | 0.28636                             | 0.01750    | 0.04009                             | 0.00079    | 305.6                                | 150.9      | 255.7                               | 13.8       | 253.4                               | 4.9        |
| YD1-464-32   | 1384     | 770     | 1.80 | 0.05079                              | 0.00141    | 0.18580                             | 0.00561    | 0.02654                             | 0.00046    | 231.6                                | 64.8       | 173.0                               | 4.8        | 168.9                               | 2.9        |
| YD1-464-33   | 840      | 865     | 0.97 | 0.05213                              | 0.00124    | 0.28211                             | 0.00770    | 0.03915                             | 0.00053    | 300.1                                | 53.7       | 252.3                               | 6.1        | 247.6                               | 3.3        |
| YD1-464-35   | 131      | 180     | 0.73 | 0.05290                              | 0.00235    | 0.31685                             | 0.01502    | 0.04335                             | 0.00077    | 324.1                                | 100.0      | 279.5                               | 11.6       | 273.6                               | 4.7        |
| YD1-464-36   | 455      | 623     | 0.73 | 0.04910                              | 0.00176    | 0.17236                             | 0.00689    | 0.02534                             | 0.00038    | 153.8                                | 85.2       | 161.5                               | 6.0        | 161.3                               | 2.4        |
| YD1-464-37   | 272      | 278     | 0.98 | 0.04975                              | 0.00234    | 0.16990                             | 0.00820    | 0.02477                             | 0.00042    | 183.4                                | 111.1      | 159.3                               | 7.1        | 157.7                               | 2.6        |
| YD1-464-38   | 302      | 395     | 0.76 | 0.09827                              | 0.00159    | 3.74967                             | 0.07057    | 0.27640                             | 0.00380    | 1591.7                               | 30.4       | 1582.0                              | 15.1       | 1573.2                              | 19.2       |
| YD1-464-41   | 54       | 79      | 0.69 | 0.16410                              | 0.00289    | 10.84543                            | 0.22345    | 0.47874                             | 0.00686    | 2498.5                               | 29.6       | 2510.0                              | 19.2       | 2521.8                              | 29.9       |
| YD1-464-45   | 70       | 174     | 0.40 | 0.16585                              | 0.00270    | 10.95170                            | 0.21522    | 0.47832                             | 0.00671    | 2516.4                               | 27.5       | 2519.0                              | 18.3       | 2520.0                              | 29.2       |
| YD1-464-46   | 316      | 291     | 1.08 | 0.05434                              | 0.00196    | 0.34810                             | 0.01288    | 0.04642                             | 0.00055    | 383.4                                | 81.5       | 303.3                               | 9.7        | 292.5                               | 3.4        |
| YD1-464-47   | 110      | 128     | 0.86 | 0.16697                              | 0.00278    | 11.00964                            | 0.22048    | 0.47781                             | 0.00762    | 2527.5                               | 28.1       | 2523.9                              | 18.6       | 2517.7                              | 33.2       |
| YD1-464-48   | 366      | 398     | 0.92 | 0.05588                              | 0.00152    | 0.47330                             | 0.01300    | 0.06147                             | 0.00081    | 455.6                                | 59.3       | 393.5                               | 9.0        | 384.5                               | 4.9        |
| YD1-464-49   | 872      | 1001    | 0.87 | 0.05028                              | 0.00102    | 0.27035                             | 0.00578    | 0.03905                             | 0.00064    | 209.3                                | 43.5       | 243.0                               | 4.6        | 246.9                               | 3.9        |

**Continued Table S2.** LA-ICP-MS zircon U-Pb data of the calcareous feldspar lithic sandstone (YD1-464).

| Point number | Th (ppm) | U (ppm) | Th/U | Isotope ratio                        |            |                                     |            |                                     |            | Age (Ma)                             |            |                                     |            |                                     |            |
|--------------|----------|---------|------|--------------------------------------|------------|-------------------------------------|------------|-------------------------------------|------------|--------------------------------------|------------|-------------------------------------|------------|-------------------------------------|------------|
|              |          |         |      | <sup>207</sup> Pb/ <sup>206</sup> Pb | 1 $\sigma$ | <sup>207</sup> Pb/ <sup>235</sup> U | 1 $\sigma$ | <sup>206</sup> Pb/ <sup>238</sup> U | 1 $\sigma$ | <sup>207</sup> Pb/ <sup>206</sup> Pb | 1 $\sigma$ | <sup>207</sup> Pb/ <sup>235</sup> U | 1 $\sigma$ | <sup>206</sup> Pb/ <sup>238</sup> U | 1 $\sigma$ |
| YD1-464-50   | 168      | 211     | 0.80 | 0.16626                              | 0.00282    | 10.64959                            | 0.27004    | 0.46429                             | 0.00997    | 2520.1                               | 29.2       | 2493.0                              | 23.5       | 2458.5                              | 43.9       |
| YD1-464-51   | 164      | 131     | 1.25 | 0.05042                              | 0.00378    | 0.17099                             | 0.01282    | 0.02489                             | 0.00049    | 213.0                                | 178.7      | 160.3                               | 11.1       | 158.5                               | 3.1        |
| YD1-464-52   | 160      | 304     | 0.53 | 0.05110                              | 0.00200    | 0.27462                             | 0.01037    | 0.03908                             | 0.00054    | 255.6                                | 88.9       | 246.4                               | 8.3        | 247.2                               | 3.3        |
| YD1-464-54   | 24       | 22      | 1.09 | 0.11459                              | 0.00477    | 4.63359                             | 0.18862    | 0.29364                             | 0.00400    | 1873.2                               | 75.3       | 1755.3                              | 34.0       | 1659.7                              | 19.9       |
| YD1-464-55   | 152      | 97      | 1.56 | 0.05348                              | 0.00373    | 0.16623                             | 0.01162    | 0.02268                             | 0.00054    | 350.1                                | 157.4      | 156.1                               | 10.1       | 144.6                               | 3.4        |
| YD1-464-56   | 169      | 268     | 0.63 | 0.05057                              | 0.00226    | 0.16259                             | 0.00699    | 0.02345                             | 0.00044    | 220.4                                | 99.1       | 153.0                               | 6.1        | 149.5                               | 2.7        |
| YD1-464-57   | 620      | 412     | 1.50 | 0.05220                              | 0.00234    | 0.16378                             | 0.00725    | 0.02283                             | 0.00036    | 294.5                                | 103.7      | 154.0                               | 6.3        | 145.5                               | 2.3        |
| YD1-464-58   | 257      | 334     | 0.77 | 0.15685                              | 0.00229    | 9.99169                             | 0.24982    | 0.46088                             | 0.00896    | 2421.9                               | 24.2       | 2434.0                              | 23.1       | 2443.5                              | 39.5       |
| YD1-464-59   | 83       | 143     | 0.58 | 0.05631                              | 0.00363    | 0.30460                             | 0.01996    | 0.03958                             | 0.00077    | 464.9                                | 144.4      | 270.0                               | 15.5       | 250.2                               | 4.8        |
| YD1-464-60   | 512      | 444     | 1.15 | 0.05387                              | 0.00244    | 0.18697                             | 0.00883    | 0.02522                             | 0.00050    | 364.9                                | 101.8      | 174.0                               | 7.6        | 160.6                               | 3.1        |
| YD1-464-61   | 166      | 152     | 1.10 | 0.11205                              | 0.00197    | 4.62436                             | 0.11095    | 0.29866                             | 0.00456    | 1833.0                               | 26.9       | 1753.7                              | 20.0       | 1684.7                              | 22.6       |
| YD1-464-64   | 328      | 454     | 0.72 | 0.05289                              | 0.00175    | 0.30164                             | 0.01047    | 0.04132                             | 0.00054    | 324.1                                | 71.3       | 267.7                               | 8.2        | 261.0                               | 3.4        |
| YD1-464-67   | 125      | 226     | 0.55 | 0.04924                              | 0.00357    | 0.15101                             | 0.01046    | 0.02233                             | 0.00036    | 166.8                                | 153.7      | 142.8                               | 9.2        | 142.3                               | 2.3        |
| YD1-464-68   | 760      | 1140    | 0.67 | 0.05414                              | 0.00127    | 0.26874                             | 0.00799    | 0.03588                             | 0.00061    | 376.0                                | 51.8       | 241.7                               | 6.4        | 227.3                               | 3.8        |
| YD1-464-69   | 397      | 363     | 1.09 | 0.05093                              | 0.00172    | 0.26025                             | 0.01006    | 0.03691                             | 0.00062    | 239.0                                | 77.8       | 234.9                               | 8.1        | 233.7                               | 3.8        |
| YD1-464-70   | 58       | 52      | 1.13 | 0.05361                              | 0.00788    | 0.17953                             | 0.02716    | 0.02480                             | 0.00067    | 353.8                                | 303.7      | 167.7                               | 23.4       | 158.0                               | 4.2        |
| YD1-464-71   | 363      | 600     | 0.60 | 0.05574                              | 0.00175    | 0.35295                             | 0.01276    | 0.04577                             | 0.00073    | 442.6                                | 68.5       | 306.9                               | 9.6        | 288.5                               | 4.5        |
| YD1-464-72   | 376      | 327     | 1.15 | 0.04908                              | 0.00150    | 0.30868                             | 0.00938    | 0.04567                             | 0.00066    | 150.1                                | 70.4       | 273.2                               | 7.3        | 287.9                               | 4.0        |
| YD1-464-73   | 977      | 740     | 1.32 | 0.05456                              | 0.00145    | 0.29371                             | 0.00762    | 0.03911                             | 0.00060    | 394.5                                | 54.6       | 261.5                               | 6.0        | 247.3                               | 3.8        |
| YD1-464-74   | 130      | 155     | 0.84 | 0.05757                              | 0.00295    | 0.45455                             | 0.02354    | 0.05726                             | 0.00074    | 522.3                                | 117.6      | 380.5                               | 16.4       | 358.9                               | 4.5        |
| YD1-464-76   | 260      | 313     | 0.83 | 0.16567                              | 0.00217    | 11.11883                            | 0.21418    | 0.48573                             | 0.00727    | 2514.5                               | 21.9       | 2533.1                              | 17.9       | 2552.2                              | 31.5       |
| YD1-464-78   | 314      | 444     | 0.71 | 0.05568                              | 0.00151    | 0.52467                             | 0.01357    | 0.06844                             | 0.00096    | 438.9                                | 54.6       | 428.3                               | 9.0        | 426.8                               | 5.8        |
| YD1-464-80   | 346      | 464     | 0.75 | 0.17606                              | 0.00272    | 12.14546                            | 0.25048    | 0.50014                             | 0.00868    | 2616.4                               | 26.1       | 2615.7                              | 19.3       | 2614.4                              | 37.3       |
| YD1-464-82   | 150      | 293     | 0.51 | 0.05534                              | 0.00254    | 0.31728                             | 0.01441    | 0.04169                             | 0.00060    | 433.4                                | 101.8      | 279.8                               | 11.1       | 263.3                               | 3.7        |
| YD1-464-83   | 100      | 212     | 0.47 | 0.16777                              | 0.00252    | 10.45595                            | 0.19772    | 0.45190                             | 0.00651    | 2535.5                               | 25.3       | 2476.0                              | 17.5       | 2403.7                              | 28.9       |
| YD1-464-84   | 735      | 274     | 2.68 | 0.05504                              | 0.00277    | 0.27495                             | 0.01364    | 0.03632                             | 0.00060    | 413.0                                | 113.0      | 246.6                               | 10.9       | 230.0                               | 3.7        |
| YD1-464-85   | 197      | 143     | 1.37 | 0.16891                              | 0.00239    | 11.47396                            | 0.25309    | 0.49241                             | 0.00896    | 2546.6                               | 23.0       | 2562.5                              | 20.6       | 2581.1                              | 38.7       |

|            |     |     |      |         |         |         |         |         |         |        |      |        |      |        |      |
|------------|-----|-----|------|---------|---------|---------|---------|---------|---------|--------|------|--------|------|--------|------|
| YD1-464-86 | 159 | 159 | 1.00 | 0.15728 | 0.00230 | 9.86265 | 0.24068 | 0.45398 | 0.00856 | 2427.8 | 24.7 | 2422.0 | 22.5 | 2412.9 | 37.9 |
| YD1-464-87 | 125 | 241 | 0.52 | 0.05192 | 0.00204 | 0.36163 | 0.01270 | 0.05090 | 0.00071 | 283.4  | 88.9 | 313.4  | 9.5  | 320.0  | 4.3  |

**Continued Table S2.** LA-ICP-MS zircon U-Pb data of the calcareous feldspar lithic sandstone(YD1-464).

| Point<br>number | Th<br>(ppm) | U<br>(ppm) | Th/U | Isotope ratio                        |         |                                     |         |                                     |         | Age (Ma)                             |       |                                     |      |                                     |      |
|-----------------|-------------|------------|------|--------------------------------------|---------|-------------------------------------|---------|-------------------------------------|---------|--------------------------------------|-------|-------------------------------------|------|-------------------------------------|------|
|                 |             |            |      | <sup>207</sup> Pb/ <sup>206</sup> Pb | 1σ      | <sup>207</sup> Pb/ <sup>235</sup> U | 1σ      | <sup>206</sup> Pb/ <sup>238</sup> U | 1σ      | <sup>207</sup> Pb/ <sup>206</sup> Pb | 1σ    | <sup>207</sup> Pb/ <sup>235</sup> U | 1σ   | <sup>206</sup> Pb/ <sup>238</sup> U | 1σ   |
| YD1-464-88      | 371         | 456        | 0.81 | 0.04966                              | 0.00199 | 0.16949                             | 0.00678 | 0.02489                             | 0.00047 | 189.0                                | 125.0 | 159.0                               | 5.9  | 158.5                               | 2.9  |
| YD1-464-89      | 356         | 541        | 0.66 | 0.05481                              | 0.00197 | 0.28375                             | 0.01010 | 0.03770                             | 0.00064 | 405.6                                | 81.5  | 253.6                               | 8.0  | 238.6                               | 4.0  |
| YD1-464-90      | 1731        | 440        | 3.93 | 0.05206                              | 0.00222 | 0.27860                             | 0.01220 | 0.03917                             | 0.00091 | 287.1                                | 98.1  | 249.5                               | 9.7  | 247.7                               | 5.6  |
| YD1-464-91      | 331         | 370        | 0.89 | 0.05029                              | 0.00193 | 0.17772                             | 0.00630 | 0.02575                             | 0.00038 | 209.3                                | 88.9  | 166.1                               | 5.4  | 163.9                               | 2.4  |
| YD1-464-92      | 361         | 402        | 0.90 | 0.05220                              | 0.00198 | 0.18751                             | 0.00754 | 0.02616                             | 0.00064 | 294.5                                | 91.7  | 174.5                               | 6.4  | 166.4                               | 4.0  |
| YD1-464-93      | 368         | 706        | 0.52 | 0.04946                              | 0.00139 | 0.15567                             | 0.00500 | 0.02281                             | 0.00038 | 168.6                                | 66.7  | 146.9                               | 4.4  | 145.4                               | 2.4  |
| YD1-464-94      | 287         | 289        | 0.99 | 0.05263                              | 0.00182 | 0.28587                             | 0.01012 | 0.03949                             | 0.00069 | 322.3                                | 79.6  | 255.3                               | 8.0  | 249.7                               | 4.3  |
| YD1-464-96      | 471         | 771        | 0.61 | 0.07815                              | 0.00118 | 2.13110                             | 0.04643 | 0.19758                             | 0.00377 | 1150.9                               | 30.1  | 1158.9                              | 15.1 | 1162.3                              | 20.3 |
| YD1-464-97      | 84          | 85         | 0.99 | 0.05020                              | 0.00387 | 0.28257                             | 0.02004 | 0.04135                             | 0.00067 | 211.2                                | 179.6 | 252.7                               | 15.9 | 261.2                               | 4.1  |
| YD1-464-98      | 267         | 635        | 0.42 | 0.05315                              | 0.00150 | 0.31432                             | 0.00924 | 0.04286                             | 0.00063 | 344.5                                | 32.4  | 277.5                               | 7.1  | 270.5                               | 3.9  |
| YD1-464-99      | 180         | 329        | 0.55 | 0.05496                              | 0.00240 | 0.29667                             | 0.01332 | 0.03910                             | 0.00063 | 409.3                                | 98.1  | 263.8                               | 10.4 | 247.3                               | 3.9  |
| YD1-464-100     | 212         | 230        | 0.92 | 0.05303                              | 0.00349 | 0.18461                             | 0.01151 | 0.02559                             | 0.00047 | 331.5                                | 150.0 | 172.0                               | 9.9  | 162.9                               | 3.0  |

**Table S3.** LA-ICP-MS zircon U-Pb data of the rhyolitic tuff (YD1-878).

| Point<br>number | Th<br>(ppm) | U<br>(ppm) | Th/U | Isotope ratio                        |         |                                     |         |                                     |         | Age (Ma)                             |       |                                     |      |                                     |     |
|-----------------|-------------|------------|------|--------------------------------------|---------|-------------------------------------|---------|-------------------------------------|---------|--------------------------------------|-------|-------------------------------------|------|-------------------------------------|-----|
|                 |             |            |      | <sup>207</sup> Pb/ <sup>206</sup> Pb | 1σ      | <sup>207</sup> Pb/ <sup>235</sup> U | 1σ      | <sup>206</sup> Pb/ <sup>238</sup> U | 1σ      | <sup>207</sup> Pb/ <sup>206</sup> Pb | 1σ    | <sup>207</sup> Pb/ <sup>235</sup> U | 1σ   | <sup>206</sup> Pb/ <sup>238</sup> U | 1σ  |
| YD1-878-01      | 217         | 187        | 1.16 | 0.05657                              | 0.00425 | 0.18803                             | 0.01387 | 0.02422                             | 0.00059 | 476.0                                | 166.6 | 174.9                               | 11.9 | 154.3                               | 3.7 |
| YD1-878-03      | 400         | 460        | 0.87 | 0.05311                              | 0.00235 | 0.17505                             | 0.00769 | 0.02396                             | 0.00028 | 344.5                                | 100.0 | 163.8                               | 6.6  | 152.6                               | 1.8 |
| YD1-878-04      | 297         | 501        | 0.59 | 0.04846                              | 0.00217 | 0.15679                             | 0.00680 | 0.02353                             | 0.00023 | 120.5                                | 110.2 | 147.9                               | 6.0  | 149.9                               | 1.4 |
| YD1-878-09      | 492         | 526        | 0.93 | 0.05338                              | 0.00310 | 0.17844                             | 0.00996 | 0.02440                             | 0.00025 | 346.4                                | 131.5 | 166.7                               | 8.6  | 155.4                               | 1.6 |
| YD1-878-10      | 477         | 546        | 0.87 | 0.05427                              | 0.00270 | 0.18765                             | 0.00905 | 0.02513                             | 0.00037 | 383.4                                | 83.3  | 174.6                               | 7.7  | 160.0                               | 2.4 |
| YD1-878-11      | 394         | 217        | 1.81 | 0.04893                              | 0.00314 | 0.16664                             | 0.00977 | 0.02504                             | 0.00042 | 142.7                                | 144.4 | 156.5                               | 8.5  | 159.4                               | 2.6 |
| YD1-878-15      | 234         | 171        | 1.37 | 0.04915                              | 0.00511 | 0.16333                             | 0.01623 | 0.02436                             | 0.00041 | 153.8                                | 235.2 | 153.6                               | 14.2 | 155.2                               | 2.6 |
| YD1-878-16      | 206         | 206        | 1.00 | 0.05423                              | 0.00336 | 0.18239                             | 0.01179 | 0.02450                             | 0.00044 | 388.9                                | 143.5 | 170.1                               | 10.1 | 156.0                               | 2.8 |
| YD1-878-17      | 492         | 273        | 1.80 | 0.05352                              | 0.00333 | 0.17570                             | 0.00989 | 0.02412                             | 0.00041 | 350.1                                | 137.9 | 164.4                               | 8.5  | 153.6                               | 2.6 |
| YD1-878-21      | 492         | 542        | 0.91 | 0.04685                              | 0.00226 | 0.15309                             | 0.00773 | 0.02369                             | 0.00032 | 42.7                                 | 111.1 | 144.6                               | 6.8  | 150.9                               | 2.0 |
| YD1-878-22      | 148         | 153        | 0.97 | 0.05391                              | 0.00436 | 0.18034                             | 0.01496 | 0.02417                             | 0.00035 | 368.6                                | 183.3 | 168.4                               | 12.9 | 153.9                               | 2.2 |
| YD1-878-24      | 350         | 386        | 0.91 | 0.04888                              | 0.00217 | 0.16504                             | 0.00733 | 0.02451                             | 0.00029 | 142.7                                | 103.7 | 155.1                               | 6.4  | 156.1                               | 1.8 |
| YD1-878-25      | 286         | 184        | 1.56 | 0.05270                              | 0.00422 | 0.17000                             | 0.01317 | 0.02362                             | 0.00047 | 316.7                                | 181.5 | 159.4                               | 11.4 | 150.5                               | 2.9 |
| YD1-878-28      | 157         | 170        | 0.93 | 0.04688                              | 0.00347 | 0.15177                             | 0.01037 | 0.02371                             | 0.00040 | 42.7                                 | 170.3 | 143.5                               | 9.1  | 151.1                               | 2.5 |
| YD1-878-30      | 337         | 216        | 1.56 | 0.05265                              | 0.00401 | 0.17312                             | 0.01256 | 0.02404                             | 0.00044 | 322.3                                | 174.1 | 162.1                               | 10.9 | 153.1                               | 2.8 |
